# Supplementary material for: Diagnostic Accuracy of Bronchoalveolar Lavage Fluid Galactomannan for Invasive Aspergillosis
Source: Hindawi journal article supplement (doi:10.1155/2020/5434589), 2020-01-01
Supplement: f1 [file 5434589.f1.pdf]

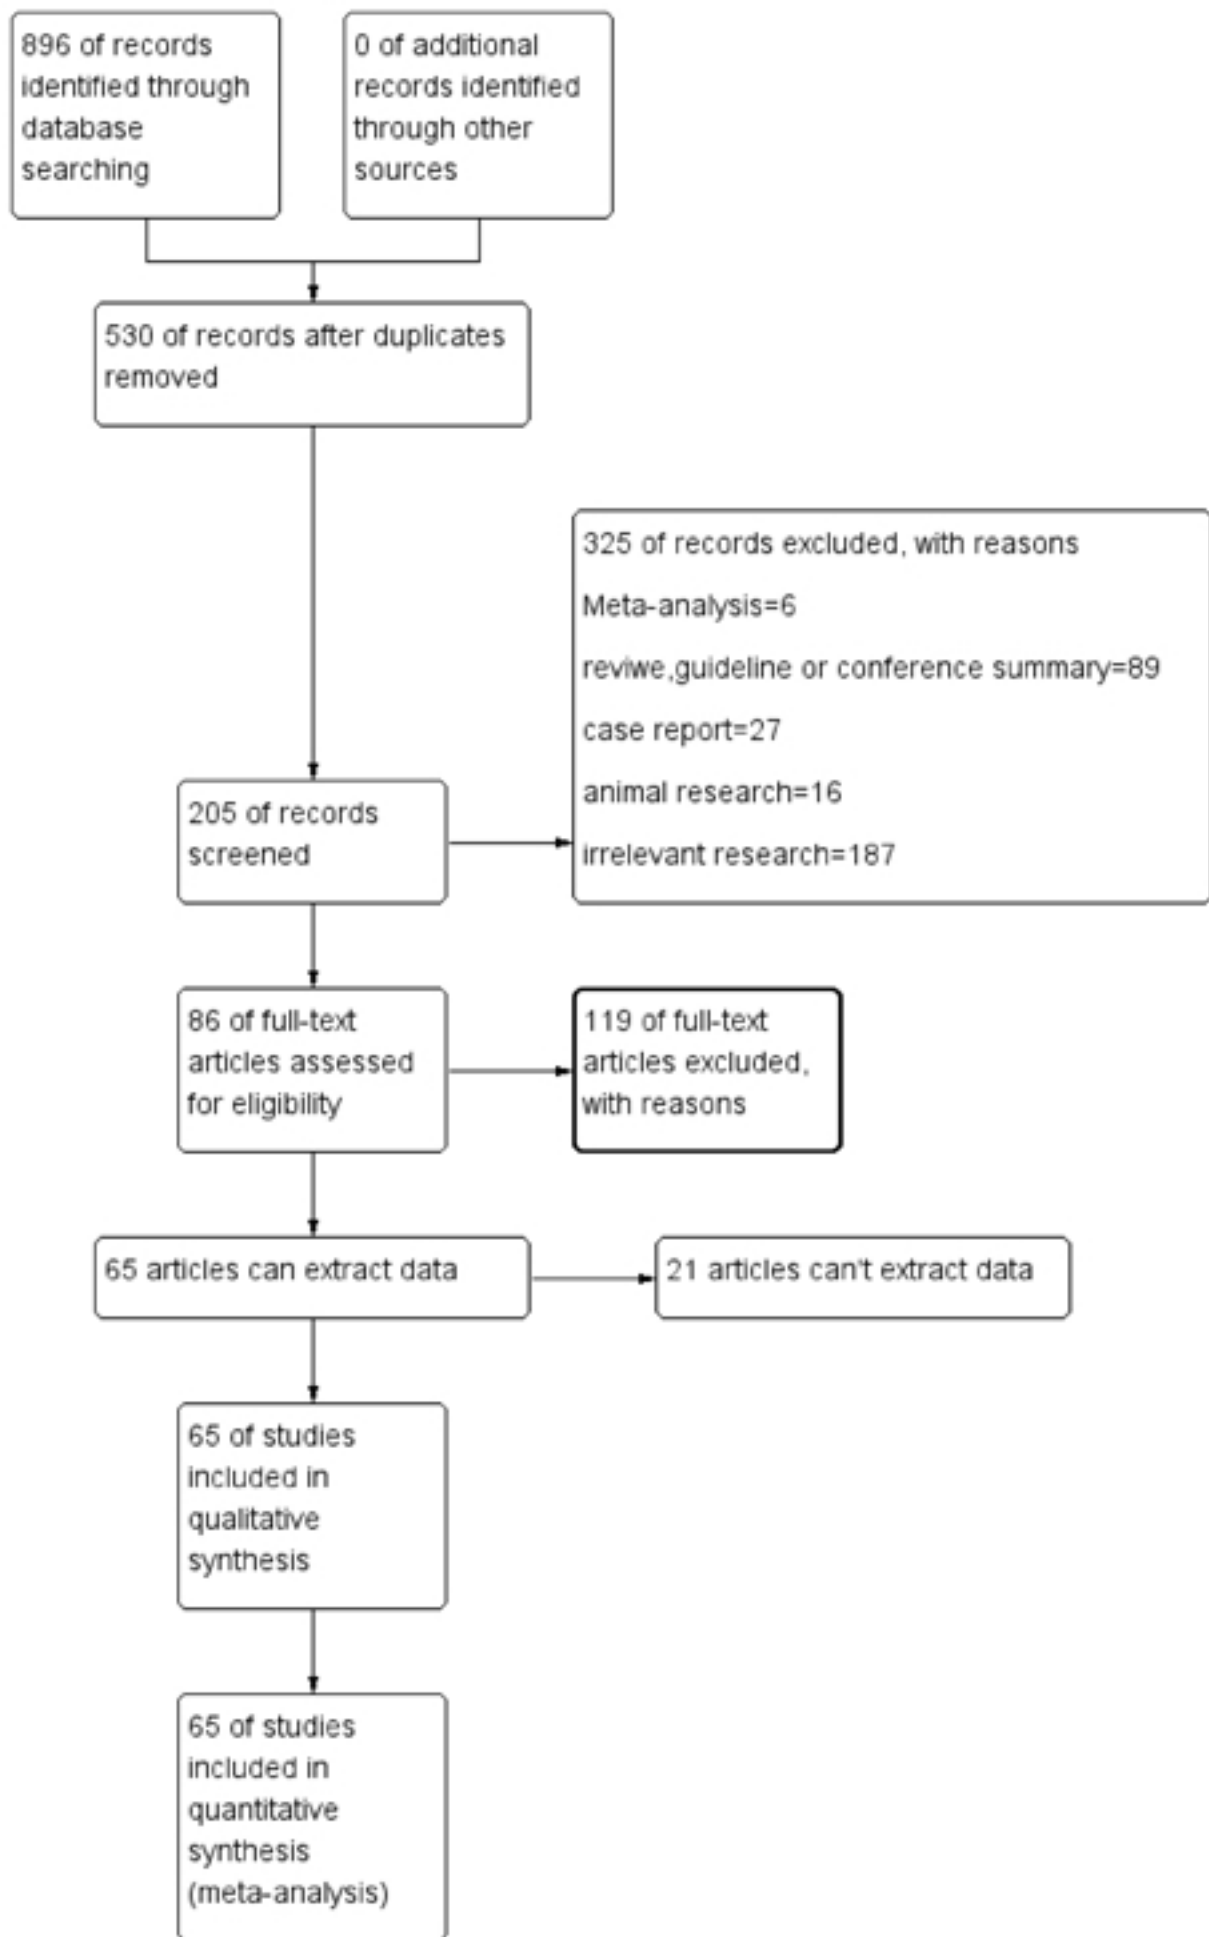

Figure S1. flow diagram of Inclusion and exclusion studies.
